# Supplementary material for: A Rapid Non-Destructive Hyperspectral Imaging Data Model for the Prediction of Pungent Constituents in Dried Ginger
Source: MDPI journal article supplement (doi:10.3390/foods11050649), 2022-02-23
Supplement: s1 [file s1]

*"Foods"*

Supporting Information for

**A rapid non-destructive hyperspectral imaging data model for the prediction of pungent constituents in dried ginger**

Nahidul Hoque Samrat<sup>1,2</sup>, Joel B. Johnson<sup>1,2</sup>, Simon White<sup>1,2</sup>, Mani Naiker<sup>1,2</sup>, Philip Brown<sup>1,2</sup>

<sup>1</sup> School of Health, Medical and Applied Sciences, Central Queensland University, Queensland, Australia.

<sup>2</sup> Institute for Future Farming Systems, Central Queensland University, Queensland, Australia.

**Contents of this file**

Figure S1

Text S1

Table S1-S3

## Introduction

This supporting information file contains the supplementary figure, text and tables as referenced in the main article.

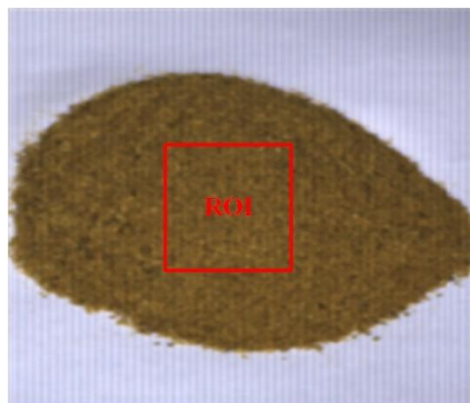

**Figure S1.** Image of a ginger powder sample with the region of interest (ROI), taken by the Specim IQ hyperspectral VS-NIR camera.

### **S1: Model evaluation and comparison**

The model's accuracy was evaluated based on the coefficient of determination ( $R^2$ ), root means square error (RMSE), and the ratio of performance to deviation (RPD) values. The model fitting are divided into three categories: poor, good, and best, based on the RPD values. The models that provided  $RPD < 1.4$  for the predictions were considered as “poor”, those with  $1.4 < RPD < 2$  was considered as “good” [1-3]. Best-fit models were selected based on having the highest  $R^2$  and RPD, and the lowest RMSE in the training and test sets.

| Model categories | Color code |
|------------------|------------|
| Poor fit         |            |
| Good fit         |            |
| Best fit         |            |

**Table S1: Considering full wavelength for PLSR and LASSO**

| Model | Preprocessing technique | PLSR LV | LASSO alpha value | Wavelength | PLSR     |      |      |      |      |      | LASSO    |      |      |      |      |      |
|-------|-------------------------|---------|-------------------|------------|----------|------|------|------|------|------|----------|------|------|------|------|------|
|       |                         |         |                   |            | Training |      |      | Test |      |      | Training |      |      | Test |      |      |
|       |                         |         |                   |            | R2       | RMSE | RPD  | R2   | RMSE | RPD  | R2       | RMSE | RPD  | R2   | RMSE | RPD  |
| I     | None                    | 13      | 0.116e-3          | 204        | 0.83     | 0.22 | 2.46 | 0.70 | 0.31 | 1.82 | 0.74     | 0.28 | 1.97 | 0.68 | 0.32 | 1.76 |
| II    | 1D-SG                   | 10      | 0.181e-3          | 204        | 0.79     | 0.25 | 2.20 | 0.61 | 0.35 | 1.62 | 0.86     | 0.20 | 2.74 | 0.55 | 0.37 | 1.50 |
| III   | 2D-SG                   | 9       | 0.943e-3          | 204        | 0.78     | 0.26 | 2.13 | 0.70 | 0.30 | 1.85 | 0.80     | 0.25 | 2.23 | 0.73 | 0.29 | 1.94 |
| IV    | SNV                     | 13      | 0.413e-3          | 204        | 0.89     | 0.18 | 3.07 | 0.62 | 0.35 | 1.62 | 0.79     | 0.25 | 2.18 | 0.70 | 0.31 | 1.82 |
| V     | MSC                     | 12      | 0.364e-3          | 204        | 0.86     | 0.20 | 2.68 | 0.73 | 0.29 | 1.92 | 0.78     | 0.26 | 2.14 | 0.70 | 0.31 | 1.83 |
| VI    | MF5                     | 13      | 9.013e-5          | 204        | 0.79     | 0.25 | 2.23 | 0.70 | 0.31 | 1.82 | 0.71     | 0.30 | 1.86 | 0.66 | 0.32 | 1.73 |
| VII   | MF9                     | 13      | 7.938e-5          | 204        | 0.78     | 0.25 | 2.16 | 0.70 | 0.31 | 1.83 | 0.70     | 0.30 | 1.84 | 0.70 | 0.30 | 1.84 |
| VIII  | MSC+SNV                 | 13      | 0.413e-3          | 204        | 0.89     | 0.18 | 3.07 | 0.62 | 0.35 | 1.62 | 0.79     | 0.25 | 2.18 | 0.70 | 0.31 | 1.82 |

Latent variable(LV); Partial least squares regression(PLSR);Least absolute shrinkage and selection operator (LASSO)

**Table S2: Optimum wavelength selection from full wavelength based on Beta-coefficient**

| Model | Preprocessing<br>technique | PLSR LV | Wavelength | PLSR     |      |      |      |      |      |
|-------|----------------------------|---------|------------|----------|------|------|------|------|------|
|       |                            |         |            | Training |      |      | Test |      |      |
|       |                            |         |            | R2       | RMSE | RPD  | R2   | RMSE | RPD  |
| I     | None                       | 13      | 59         | 0.86     | 0.20 | 2.67 | 0.56 | 0.37 | 1.51 |
| II    | 1D-SG                      | 10      | 51         | 0.70     | 0.30 | 1.82 | 0.35 | 0.45 | 1.24 |
| III   | 2D-SG                      | 9       | 53         | 0.79     | 0.25 | 2.22 | 0.71 | 0.30 | 1.87 |
| IV    | SNV                        | 13      | 55         | 0.91     | 0.16 | 3.46 | 0.37 | 0.45 | 1.26 |
| V     | MSC                        | 12      | 59         | 0.89     | 0.18 | 3.01 | 0.49 | 0.40 | 1.40 |
| VI    | MF5                        | 13      | 61         | 0.80     | 0.24 | 2.26 | 0.48 | 0.40 | 1.39 |
| VII   | MF9                        | 13      | 58         | 0.77     | 0.26 | 2.10 | 0.69 | 0.31 | 1.80 |
| VIII  | MSC+SNV                    | 13      | 55         | 0.91     | 0.16 | 3.46 | 0.37 | 0.45 | 1.26 |

**Table S3: Optimum wavelength selection from full wavelength based on VIP**

| Model | Preprocessing technique | PLSR LV | Wavelength | PLSR     |      |      |      |      |      |
|-------|-------------------------|---------|------------|----------|------|------|------|------|------|
|       |                         |         |            | Training |      |      | Test |      |      |
|       |                         |         |            | R2       | RMSE | RPD  | R2   | RMSE | RPD  |
| I     | None                    | 13      | 51         | 0.80     | 0.24 | 2.24 | 0.37 | 0.45 | 1.26 |
| II    | 1D-SG                   | 10      | 84         | 0.72     | 0.29 | 1.91 | 0.36 | 0.45 | 1.25 |
| III   | 2D-SG                   | 9       | 71         | 0.76     | 0.27 | 2.04 | 0.72 | 0.29 | 1.90 |
| IV    | SNV                     | 13      | 70         | 0.79     | 0.25 | 2.20 | 0.17 | 0.51 | 1.10 |
| V     | MSC                     | 12      | 69         | 0.83     | 0.22 | 2.49 | 0.69 | 0.31 | 1.82 |
| VI    | MF5                     | 13      | 49         | 0.71     | 0.29 | 1.88 | 0.47 | 0.41 | 1.38 |
| VII   | MF9                     | 13      | 48         | 0.68     | 0.31 | 1.78 | 0.44 | 0.42 | 1.34 |
| VIII  | MSC+SNV                 | 13      | 70         | 0.79     | 0.25 | 2.20 | 0.17 | 0.51 | 1.10 |

**Reference**

- [1] S. H. Bai et al., "A non-destructive determination of peroxide values, total nitrogen and mineral nutrients in an edible tree nut using hyperspectral imaging," Computers and Electronics in Agriculture, vol. 151, pp. 492-500, 2018.

- [2] I. Tahmasbian, N. K. Morgan, S. Hosseini Bai, M. W. Dunlop, and A. F. Moss, "Comparison of Hyperspectral Imaging and Near-Infrared Spectroscopy to Determine Nitrogen and Carbon Concentrations in Wheat," *Remote Sensing*, vol. 13, no. 6, p. 1128, 2021.
- [3] I. Tahmasbian, H. M. Wallace, T. Gama, and S. H. Bai, "An automated non-destructive prediction of peroxide value and free fatty acid level in mixed nut samples," *LWT*, vol. 143, p. 110893, 2021.
